# Supplementary material for: Revealing phase relations between Fe2B7and FeB4and hypothetical Fe2B7-type Ru2B7and Os2B7: first-principles calculations
Source: Royal Society of Chemistry journal article supplement (doi:10.1039/c7ra08134k), 2017-01-01
Supplement: c7ra08134k1.pdf [file c7ra08134k1.pdf]

### Supplementary Information to:

## Revealing phase relations between $\text{Fe}_2\text{B}_7$ and $\text{FeB}_4$ and hypothetical $\text{Fe}_2\text{B}_7$ -type $\text{Ru}_2\text{B}_7$ and $\text{Os}_2\text{B}_7$ : First-principles calculations

Yunkun Zhang,<sup>a</sup> Biao Wan,<sup>a,b</sup> Lailei Wu,<sup>\*a,c</sup> Zhiping Li,<sup>c</sup> Zhibin Wang,<sup>c</sup> Jingwu Zhang,<sup>a,\*</sup>

Huiyang Gou<sup>\*b,c</sup>, and Faming Gao<sup>c</sup>

<sup>a</sup>Key Laboratory of Metastable Materials Science and Technology, College of Material Science and Engineering, Yanshan University, Qinhuangdao 066004, China.

<sup>b</sup>Center for High Pressure Science and Technology Advanced Research, Beijing 100094, China.

<sup>c</sup>Key Laboratory of Applied Chemistry, College of Environmental and Chemical Engineering, Yanshan University, Qinhuangdao 066004, China.

Correspondence and requests for materials should be addressed to

H. G. (huiyang.gou@gmail.com), L. W. (wll@ysu.edu.cn) and J. Z. (zjw@ysu.edu.cn)

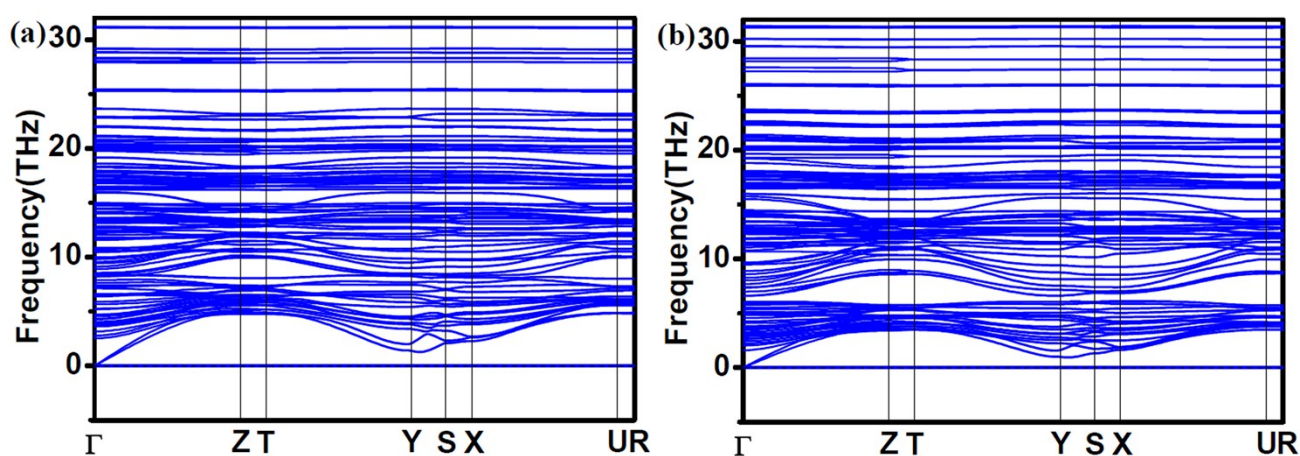

Fig. S1 Phonon dispersion curves for (a)  $\text{Ru}_2\text{B}_7$  and (b)  $\text{Os}_2\text{B}_7$ .
